# Supplementary material
Source: MDPI journal article supplement (https://www.mdpi.com/1999-4907/14/1/164)
Supplement: s1 [file s1 › forests-2137381-Supplementary Revised.pdf]

## Supporting Information

**Table S1.** The SLA values for different plant functional types between the CLM4.5 model and the observation data in China.

| Plant functional type (PFT)              | SLA parameter value in the CLM4.5 model (m <sup>2</sup> /g) | SLA observed mean value in China (m <sup>2</sup> /g) |
|------------------------------------------|-------------------------------------------------------------|------------------------------------------------------|
| temperate needleleaf evergreen tree      | 0.01                                                        | 0.007                                                |
| boreal needleleaf evergreen tree         | 0.008                                                       | 0.005                                                |
| boreal needleleaf deciduous tree         | 0.024                                                       | 0.015                                                |
| tropical broadleaf evergreen tree        | 0.012                                                       | 0.014                                                |
| temperate broadleaf evergreen tree       | 0.012                                                       | 0.014                                                |
| tropical broadleaf deciduous tree        | 0.030                                                       | 0.017                                                |
| temperate broadleaf deciduous tree       | 0.030                                                       | 0.022                                                |
| boreal broadleaf deciduous tree          | 0.030                                                       | 0.020                                                |
| temperate broadleaf evergreen shrub      | 0.012                                                       | 0.017                                                |
| temperate broadleaf deciduous shrub      | 0.030                                                       | 0.022                                                |
| boreal broadleaf deciduous shrub         | 0.030                                                       | 0.019                                                |
| C3 arctic grass                          | 0.030                                                       | 0.021                                                |
| C3 grass                                 | 0.030                                                       | 0.021                                                |
| C4 grass                                 | 0.030                                                       | 0.019                                                |
| C3 unmanaged rainfed crop                | 0.030                                                       | 0.019                                                |
| <sup>1</sup> C3 unmanaged irrigated crop | 0.030                                                       | --                                                   |
| <sup>2</sup> Rainfed corn                | 0.050                                                       | --                                                   |
| <sup>2</sup> Irrigated corn              | 0.050                                                       | --                                                   |
| <sup>2</sup> Rainfed temperate cereals   | 0.070                                                       | --                                                   |
| <sup>2</sup> Irrigated temperate cereals | 0.070                                                       | --                                                   |
| <sup>3</sup> Rainfed winter cereals      | 0.070                                                       | --                                                   |
| <sup>3</sup> Irrigated winter cereals    | 0.070                                                       | --                                                   |
| <sup>2</sup> Rainfed soybean             | 0.070                                                       | --                                                   |
| <sup>2</sup> Irrigated soybean           | 0.070                                                       | --                                                   |

<sup>1</sup>Only used if irrigation is active. <sup>2</sup>Only used if crop model is active. <sup>3</sup>Reserved for future implementations of crop model.

**Table S2.** Plant SLA information in multiple environmental factor experiments.

| Plant functional type     | Species name                               | Impact factor   | Reference          |
|---------------------------|--------------------------------------------|-----------------|--------------------|
| broadleaf deciduous tree  | <i>Phellodendron amurense</i><br>Rupr.     | light intensity | Li et al. [40]     |
| broadleaf deciduous tree  | <i>Fraxinus mandschurica</i><br>Rupr.      | light intensity | Li et al. [40]     |
| broadleaf deciduous tree  | <i>Juglans mandshurica</i><br>Maxim.       | light intensity | Li et al. [40]     |
| needleleaf evergreen tree | <i>Picea asperata</i> Mast.                | light intensity | Li et al. [40]     |
| needleleaf evergreen tree | <i>Pinus koraiensis</i>                    | light intensity | Li et al. [40]     |
| broadleaf evergreen tree  | <i>Ficus tinctoria</i> G.Forst.            | light intensity | Zhang et al. [41]  |
| broadleaf evergreen tree  | <i>Taxus. chinensis</i> var. <i>mairei</i> | light intensity | Liu et al. [42]    |
| broadleaf evergreen tree  | <i>Serianthes nelsonii</i> Merr.           | light intensity | Deloso et al. [43] |
| crop                      | <i>Triticum aestivum</i> L. (winter wheat) | growth stages   | Wu et al. [53]     |
| crop                      | <i>Zea mays</i> L.(summer maize)           | growth stages   | Cao et al. [54]    |
| broadleaf deciduous tree  | <i>Bombax ceiba</i> Linnaeus               | growth stages   | Yang et al. [55]   |
| needleleaf evergreen tree | <i>Pinus yunnanensis</i>                   | growth stages   | Zhang et al. [56]  |
| needleleaf evergreen tree | <i>Cunninghamia lanceolata</i>             | growth stages   | Peng et al. [57]   |
| broadleaf deciduous tree  | <i>Eucalyptus camaldulensis</i><br>Dehnh   | soil moisture   | Rad et al. [58]    |
| crop                      | <i>Zea mays</i> L.(summer maize)           | soil moisture   | Zhang et al. [59]  |
| broadleaf deciduous shrub | <i>Alhagi sparsifolia</i> Shap.            | soil moisture   | Huang et al. [60]  |
| broadleaf deciduous shrub | <i>Caragana intermedia</i>                 | soil moisture   | Xiao et al. [61]   |
| broadleaf deciduous shrub | <i>Sophora davidii</i>                     | soil moisture   | Wu et al. [62]     |
| C4 grass                  | <i>Cleistogenes squarrosa</i>              | soil N addition | Huang et al. [63]  |
| broadleaf deciduous shrub | <i>Artemisia frigida</i>                   | soil N addition | Huang et al. [63]  |
| C3 grass                  | <i>Leymus chinensis</i>                    | soil N addition | Sun et al. [64]    |
| C3 grass                  | <i>Thermopsis lanceolata</i>               | soil N addition | Sun et al. [64]    |
| crop                      | <i>Triticum aestivum</i> L. (winter wheat) | soil N addition | Ratjen et al. [65] |
